# Supplementary material for: Nanostructured discotic Pd(ii) metallomesogens as one-dimensional proton conductors
Source: Royal Society of Chemistry journal article supplement (doi:10.1039/c6dt03521c), 2016-11-15
Supplement: c6dt03521c1.pdf [file c6dt03521c1.pdf]

## *Electronic Supplementary Information*

### **Nanostructured discotic Pd(II) metallomesogens as one-dimensional proton conductors**

*Cristián Cuerva,<sup>a</sup> José A. Campo,<sup>a</sup> Mercedes Cano\*<sup>a</sup> and Rainer Schmidt\*<sup>b</sup>*

<sup>a</sup> Departamento de Química Inorgánica I, Facultad de Ciencias Químicas, Universidad Complutense de Madrid, Ciudad Universitaria, E-28040 Madrid, Spain.

<sup>b</sup> GFMC. Departamento de Física Aplicada III, Universidad Complutense de Madrid, Ciudad Universitaria, E-28040 Madrid, Spain.

E-mail: [mmcano@ucm.es](mailto:mmcano@ucm.es)

[rainerxschmidt@gmail.com](mailto:rainerxschmidt@gmail.com)

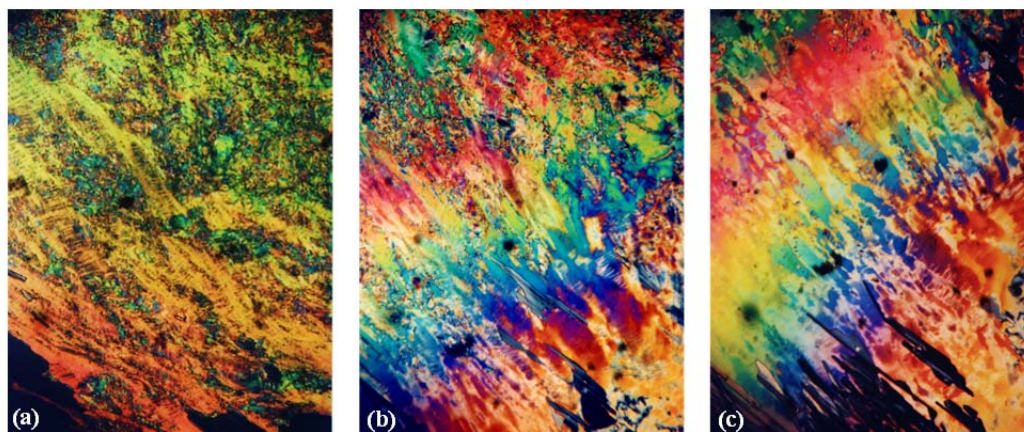

**Fig. S1.** POM microphotographs of the Col<sub>h</sub> mesophase of [Pd(pz<sup>R(8,8)iq</sup>)<sub>2</sub>] **3** at (a) 215 °C, (b) 291 °C and (c) 330 °C on heating.

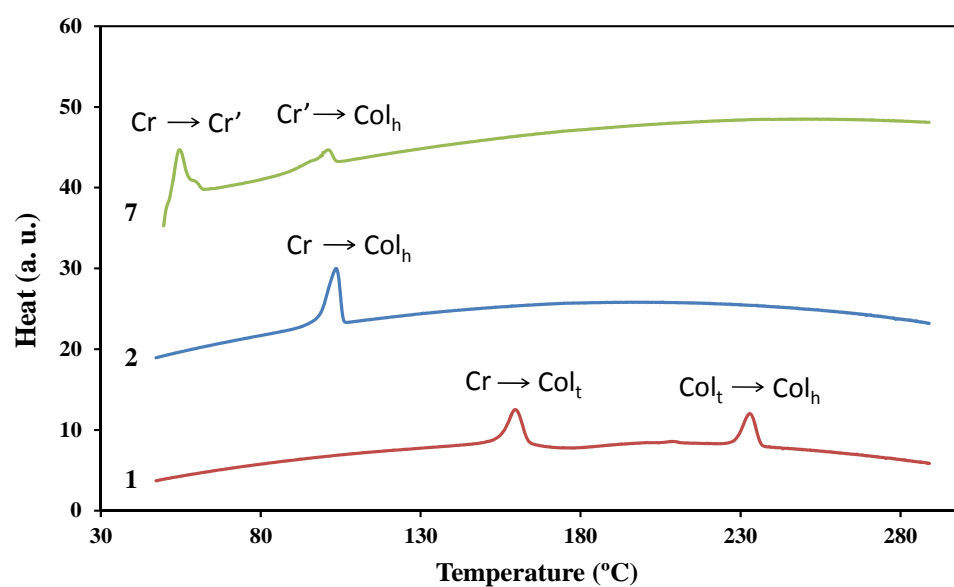

**Fig. S2.** DSC curves for compounds [Pd(pz<sup>R(4,4)iq</sup>)<sub>2</sub>] **1** , [Pd(pz<sup>R(6,6)iq</sup>)<sub>2</sub>] **2** and [Pd(pz<sup>R(16,16)iq</sup>)<sub>2</sub>] **7** on heating in the temperature range of 50 – 290 °C .

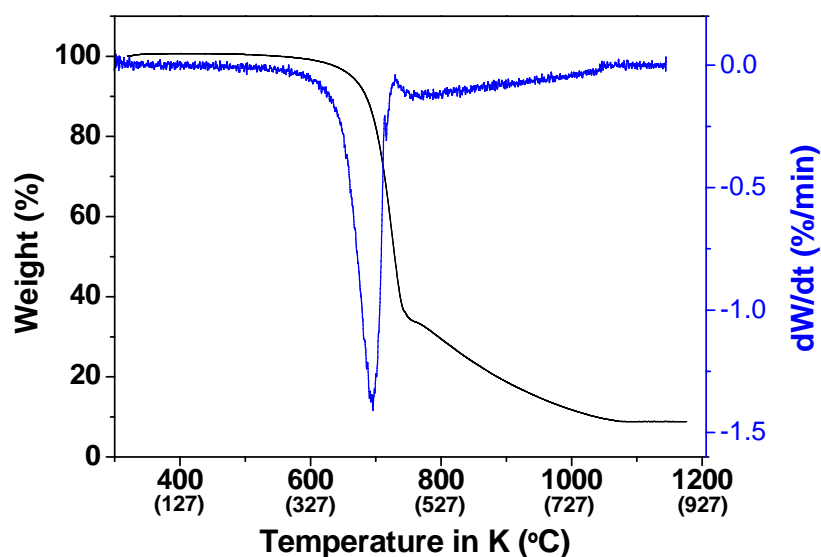

Fig. S3. TG-DTG curves for compound  $[\text{Pd}(\text{pz}^{\text{R}(16,16)\text{iq}})_2]$  7.

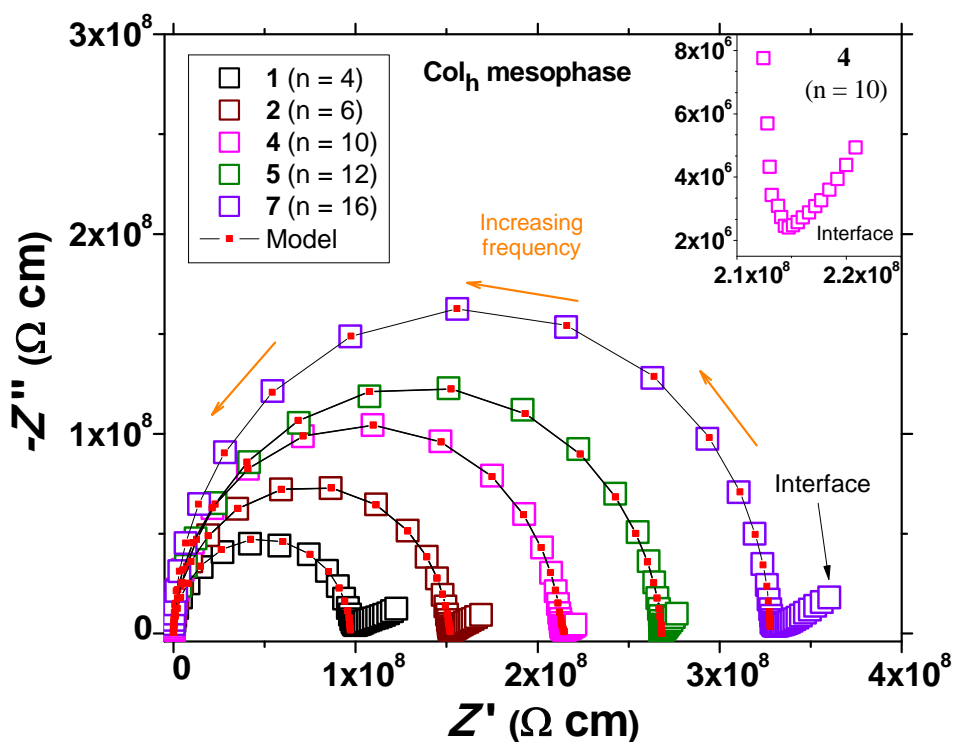

Fig. S4  $-Z''$  vs  $Z'$  plots for the Pd(II) complexes  $[\text{Pd}(\text{pz}^{\text{R}(n,n)\text{iq}})_2]$  1, 2, 4, 5 and 7 in the  $\text{Col}_h$  mesophase at 560 K / 287 °C (1,  $n = 4$ ), 570 K / 297 °C (2,  $n = 6$ ), 570 K / 297 °C (4,  $n = 10$ ), 542 K / 269 °C (5,  $n = 12$ ) and 560 K / 287 °C (7,  $n = 16$ ). Open squares represent measured data and solid lines with squares display equivalent circuit fits. The inset shows the details of the interface pike for the data collected of  $[\text{Pd}(\text{pz}^{\text{R}(10,10)\text{iq}})_2]$  4 at 570 K. The graphs for 2, 4, 5 and 7 have been enlarged by a constant factor of 24, 6, 360 and 195 respectively for demonstration purposes.

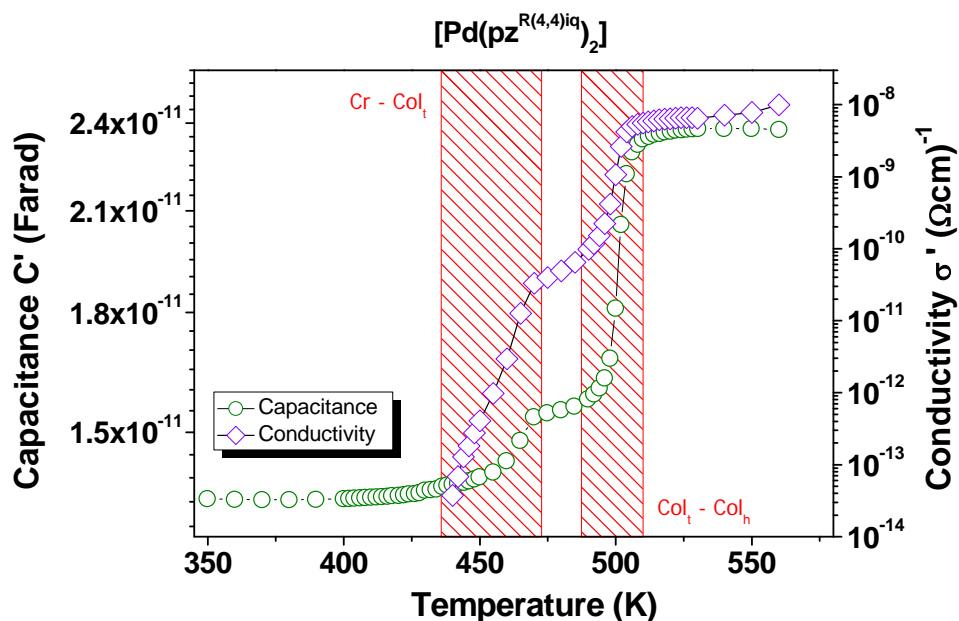

**Fig. S5**  $C'$  and  $\sigma'$  vs  $T$  plots for the complex  $[\text{Pd}(\text{pz}^{\text{R}(4,4)\text{iq}})_2]$  **1** upon heating. The capacitance was measured at 1 MHz and the conductivity values were extracted from equivalent circuit fits. The red shaded areas show the Cr- $\text{Col}_l$  and  $\text{Col}_l$ - $\text{Col}_h$  phase transitions.

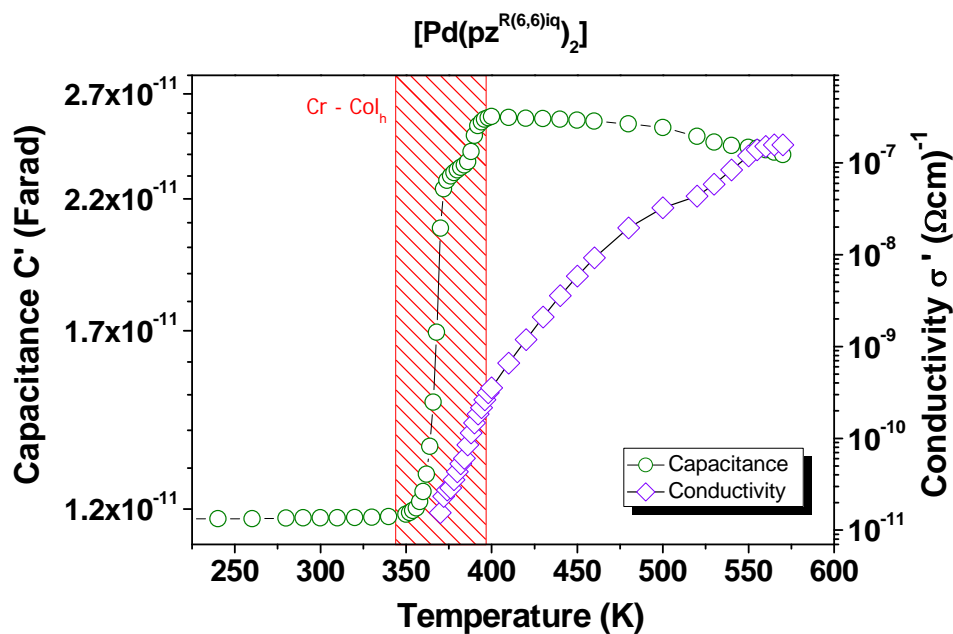

**Fig. S6**  $C'$  and  $\sigma'$  vs  $T$  plots for the complex  $[\text{Pd}(\text{pz}^{\text{R}(6,6)\text{iq}})_2]$  **2** upon heating. The capacitance was measured at 1 MHz and the conductivity values were extracted from equivalent circuit fits. The red shaded area shows the Cr- $\text{Col}_h$  phase transition.

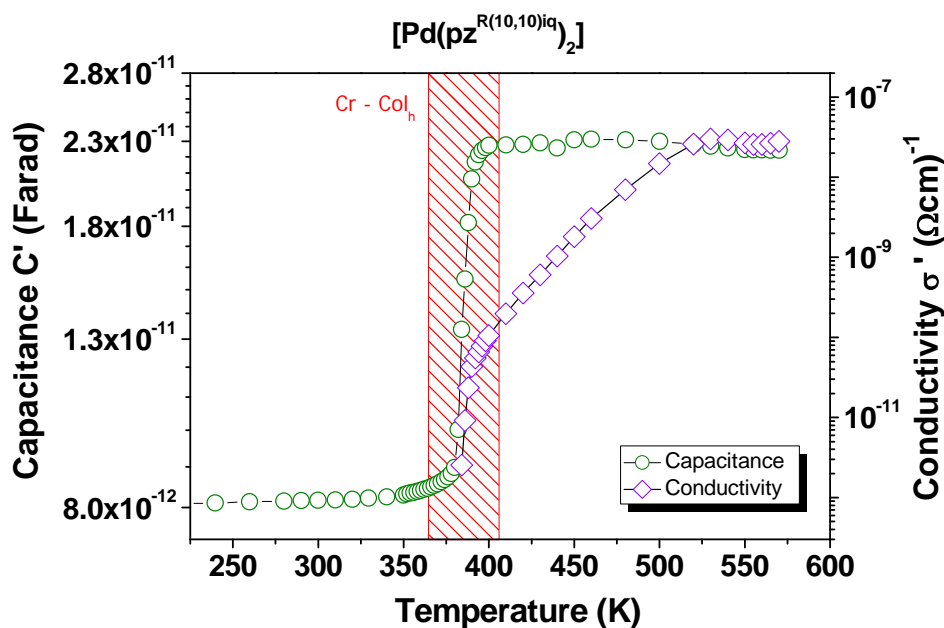

**Fig. S7**  $C'$  and  $\sigma'$  vs  $T$  plots for the complex  $[\text{Pd}(\text{pz}^{\text{R}(10,10)\text{iq}})_2]$  **4** upon heating. The capacitance was measured at 1 MHz and the conductivity values were extracted from equivalent circuit fits. The red shaded area shows the Cr-Col<sub>h</sub> phase transition.

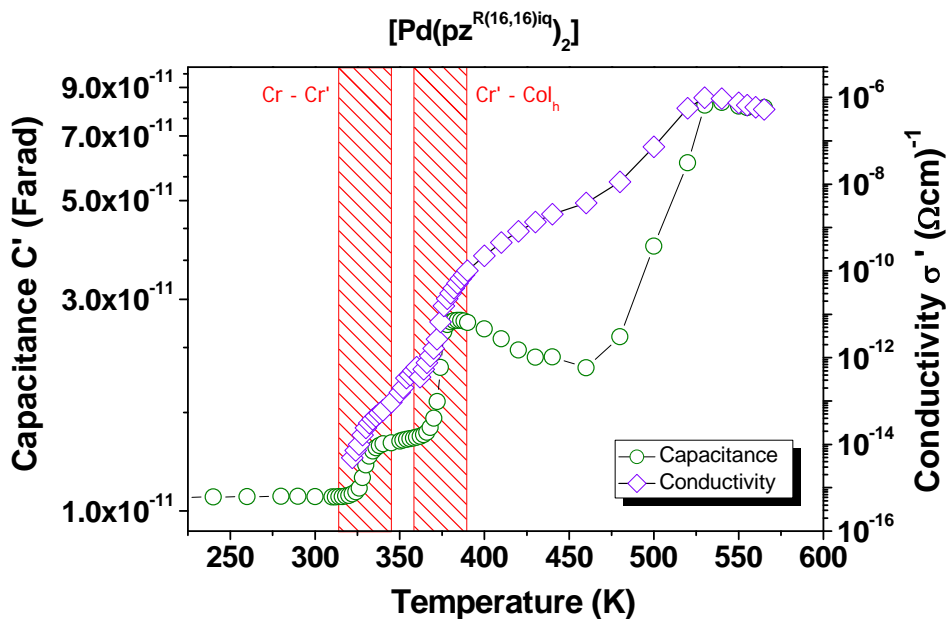

**Fig. S8**  $C'$  and  $\sigma'$  vs  $T$  plots for the complex  $[\text{Pd}(\text{pz}^{\text{R}(16,16)\text{iq}})_2]$  **7** upon heating. The capacitance was measured at 10 MHz and the conductivity values were extracted from equivalent circuit fits. The red shaded areas show the Cr-Cr' and Cr'-Col<sub>h</sub> phase transitions.
